# Supplementary material
Source: Springer Nature journal article supplement (https://www.springermedizin.de/resource/supplementary/12889_2010_3358_MOESM2_ESM.pdf/9488810)

Number of companies

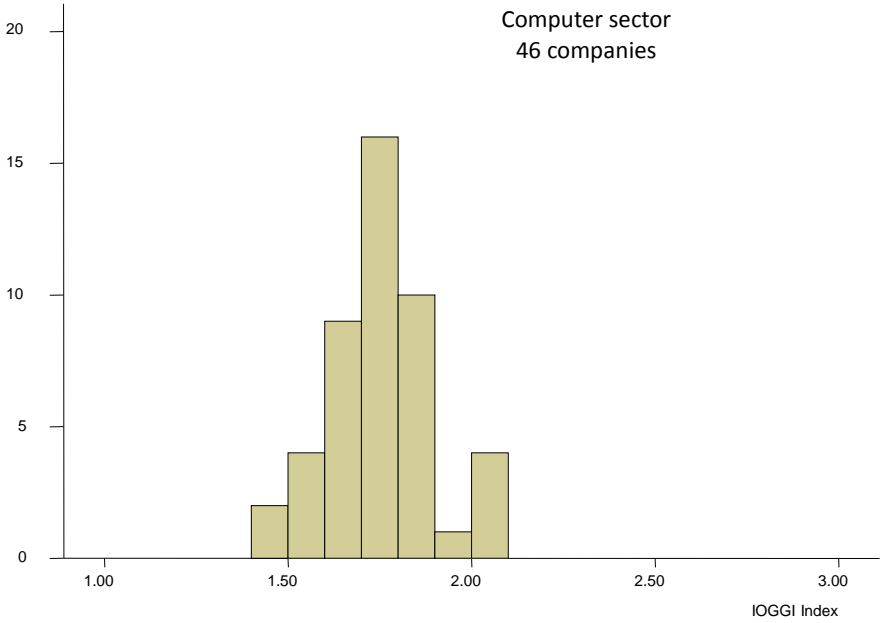

Number of companies

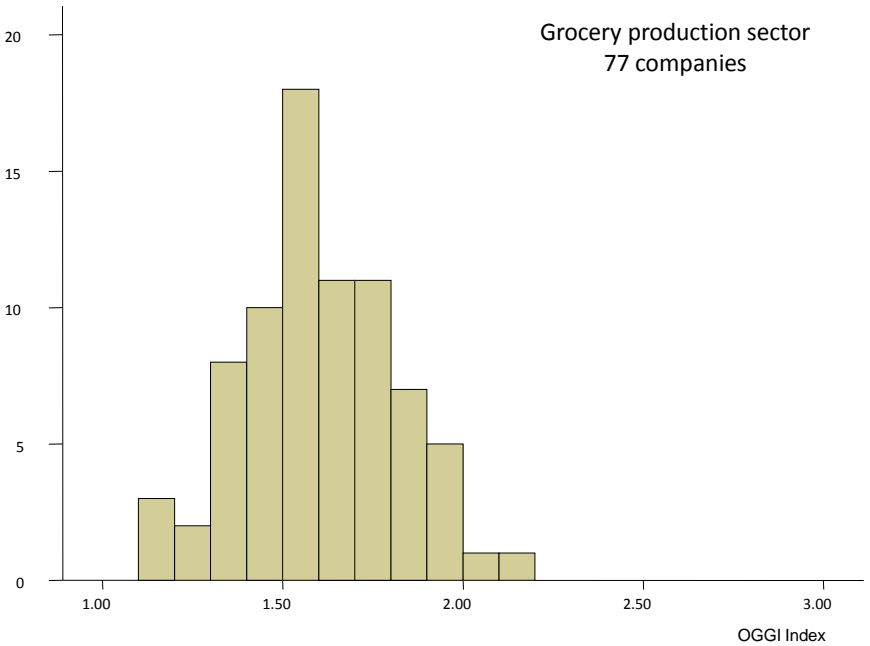

Supplement: MOESM2 [file 9488810]
